# Supplementary figures and images for: A novel inhibitory nucleo-cortical circuit controls cerebellar Golgi cell activity
Source: eLife journal article supplement (doi:10.7554/elife.06262), 2015-05-12

A GlyT2-eGFP - VIAAT

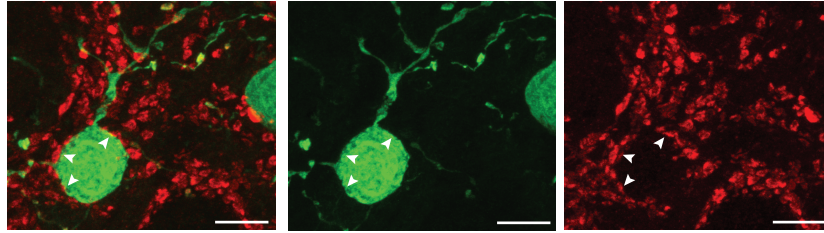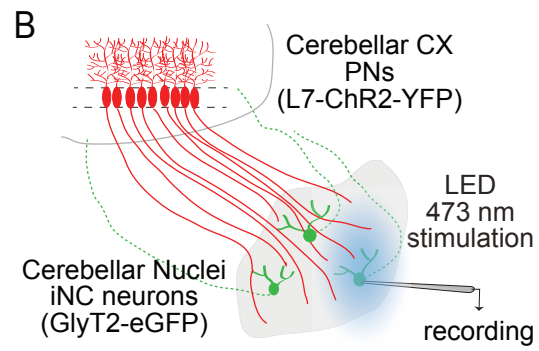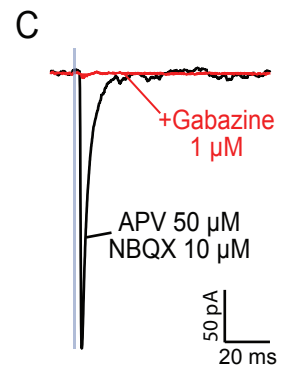

Ankri, Husson et al.  
Supplementary  
Fig. 1

Supplement: supp [file elife_poa_e06262_Figure_1_figure_supplement_1.pdf › elife_poa_e06262_Figure_1_figure_supplement_1.pdf]

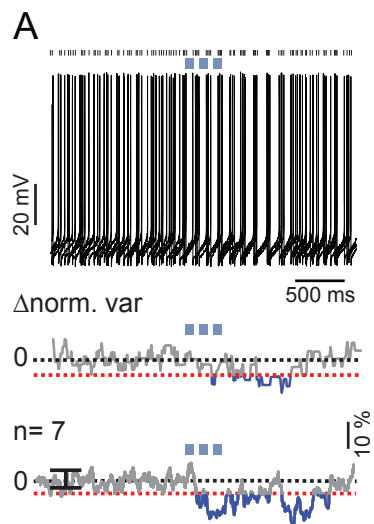

Ankri, Husson et al.  
Supplementary  
Fig. 2

Supplement: supp [file elife_poa_e06262_Figure_3_figure_supplement_1.pdf › elife_poa_e06262_Figure_3_figure_supplement_1.pdf]
